# Supplementary material for: Exploring community perceptions, attitudes and practices regarding the COVID-19 pandemic in Karachi, Pakistan
Source: PubMed Central journal article supplement — BMJ Open. 2021 Aug 12;11(8):e048359. doi: 10.1136/bmjopen-2020-048359 (PMC8366280; doi:10.1136/bmjopen-2020-048359), 2021-08-12
Supplement: bmjopen-2020-048359supp001.pdf [file bmjopen-2020-048359supp001.pdf]

## Annex-1

## In-Depth Interview Guide for interviewing community members

## Basic Information

| S.no | Participant Code (Confidential) | Age | Sex | Occupation | Educational level | Locality/site |
|------|---------------------------------|-----|-----|------------|-------------------|---------------|
|      |                                 |     |     |            |                   |               |
|      |                                 |     |     |            |                   |               |
|      |                                 |     |     |            |                   |               |
|      |                                 |     |     |            |                   |               |
|      |                                 |     |     |            |                   |               |

**General Perceptions and attitudes towards COVID-19**

1. How do you feel about your knowledge level regarding COVID-19 pandemic?
2. How did you learn about the coronavirus outbreak?
3. What is the reliable source of information about COVID-19?

Probes: social media, television, newspapers/magazines, websites, friends/family, health care professionals

4. What were your initial reactions towards COVID-19, when you first heard about it?
  - a. Probes: curse from God etc.
5. What are your thoughts and feelings about COVID-19 cases?

**Perceptions on safety measures for preventing COVID-19**

1. What safety measures have you taken for yourself and for your family safety in COVID-19?

**Probes:** hand washing, sanitizer, social distancing, covering your cough, avoiding touching your eyes, nose, and mouth with unwashed hands, wearing a face mask, avoiding close contact with someone who is sick

**Perceived risks associated with poor adherence to safety measures**

1. Do you think novel coronavirus will inflict serious damage in your community, if adequate safety measures are not taken?
2. Do you think you can protect yourself against the novel coronavirus?

**Future Preparedness**

1. In your opinion, what are the needs for future preparedness for any outbreak that prepare community (trainings, awareness, equipment, protective gears)
